# Supplementary material for: Synthesis and characterization of polyurethanes bearing carbosilane segments
Source: Royal Society of Chemistry journal article supplement (doi:10.1039/c6ra19352h), 2016-01-01
Supplement: c6ra19352h1.pdf [file c6ra19352h1.pdf]

## **Synthesis and Characterization of Polyurethanes Bearing Carbosilane Segments**

Supporting information

Ayumu Karimata<sup>1</sup>, Kouzou Matsumoto<sup>1,2</sup>, Takeshi Endo<sup>1</sup>

<sup>1</sup>Molecular Engineering Institute, Kindai University, 11-6 Kayanomori, Iizuka, Fukuoka, Japan

<sup>2</sup>Department of Biological & Environmental Chemistry, Kindai University, 11-6 Kayanomori, Iizuka, Fukuoka, Japan



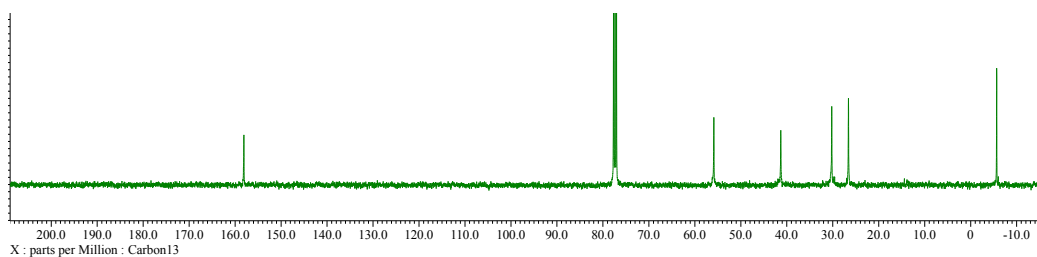

**Figure S3**  $^{13}\text{C}$  NMR spectrum of **1a** in  $\text{CDCl}_3$ .

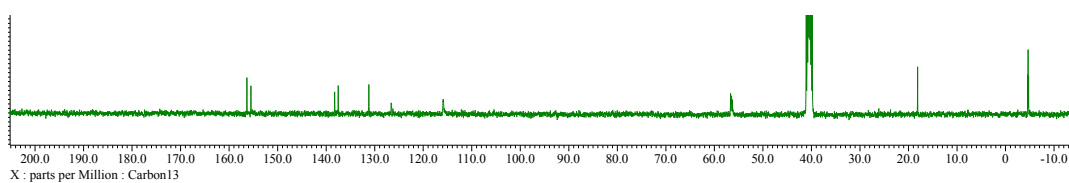

**Figure S4**  $^{13}\text{C}$  NMR spectrum of **1b** in  $\text{DMSO-}d_6$ .

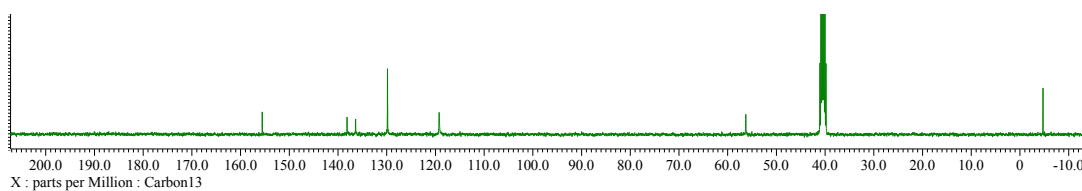

**Figure S5**  $^{13}\text{C}$  NMR spectrum of **1c** in  $\text{DMSO-}d_6$ .

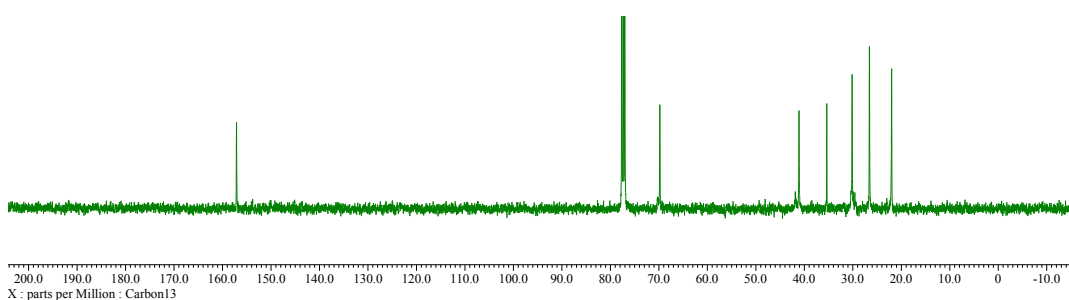

**Figure S6**  $^{13}\text{C}$  NMR spectrum of **2a** in  $\text{CDCl}_3$ .

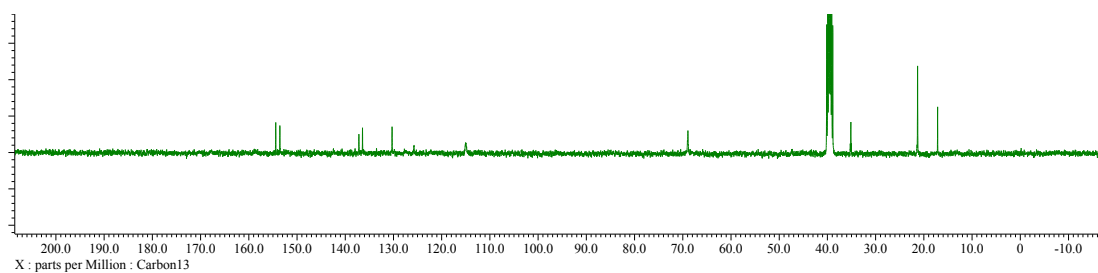

**Figure S7**  $^{13}\text{C}$  NMR spectrum of **2b** in  $\text{DMSO-}d_6$ .

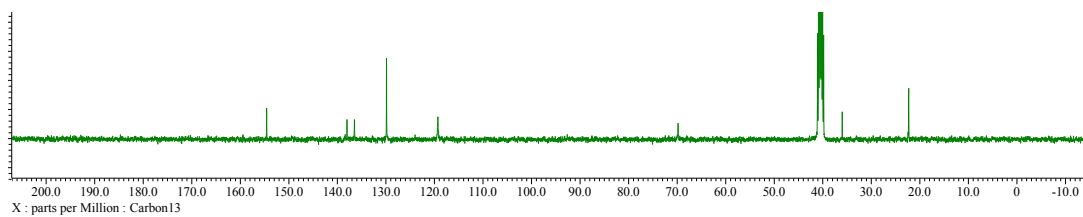

**Figure S8**  $^{13}\text{C}$  NMR spectrum of **2c** in  $\text{DMSO-}d_6$ .
